# Supplementary material for: The permissive role of TCTP in PM2.5/NNK-induced epithelial–mesenchymal transition in lung cells
Source: PubMed Central journal article supplement (PMC7011287; doi:10.1186/s12967-020-02256-5), 2020-02-11
Supplement: 12967_2020_2256_MOESM1_ESM.pdf [file 12967_2020_2256_MOESM1_ESM.pdf]

# **The permissive role of TCTP in PM<sub>2.5</sub>/NNK-induced epithelial-mesenchymal transition in lung cells**

## **Running title: TCTP controls carcinogenic EMT in lung cells**

Li-Zhong Liu<sup>1\*</sup>, Menghuan Wang<sup>1</sup>, Qihang Xin<sup>1</sup>, Bowen Wang<sup>1</sup>, George G Chen<sup>2, 4\*</sup>, Ming-Yue Li<sup>2, 3, 4\*</sup>

<sup>1</sup>Guangdong Provincial Key Laboratory of Regional Immunity and Diseases, Department of Physiology, School of Medicine, Shenzhen University Health Science Center, Shenzhen University, Shenzhen, China.

<sup>2</sup>Department of Surgery, The Chinese University of Hong Kong, Prince of Wales Hospital, Shatin N.T., Hong Kong.

<sup>3</sup>Guangzhou Regenerative Medicine and Health Guangdong Laboratory, Guangzhou, China

<sup>4</sup>Shenzhen Research Institute, The Chinese University of Hong Kong, Shenzhen, Guangdong, China.

**\*Corresponding author:** Ming-Yue Li or George G Chen, Department of Surgery, Prince of Wales Hospital, Shatin N.T., Hong Kong. Tel: 852 37636161; Fax: 852 26450605; Email: brightmoonli@yahoo.com or gchen@cuhk.edu.hk; or Li-Zhong Liu, Faculty of Medicine, Shenzhen University Health Science Center, Shenzhen University, Shenzhen, China. Tel: 86-755-86671936; Email: liulz@szu.edu.cn.

### **Additional file 1 information:**

1. Figures S1-S3
2. Tables S1-S2

**Figure S1**

**A**

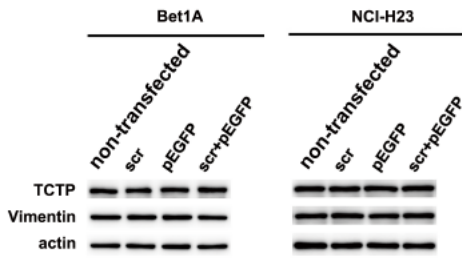

**B**

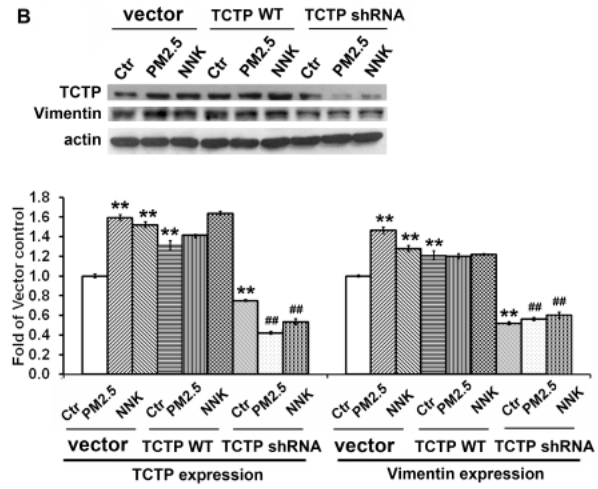

**C**

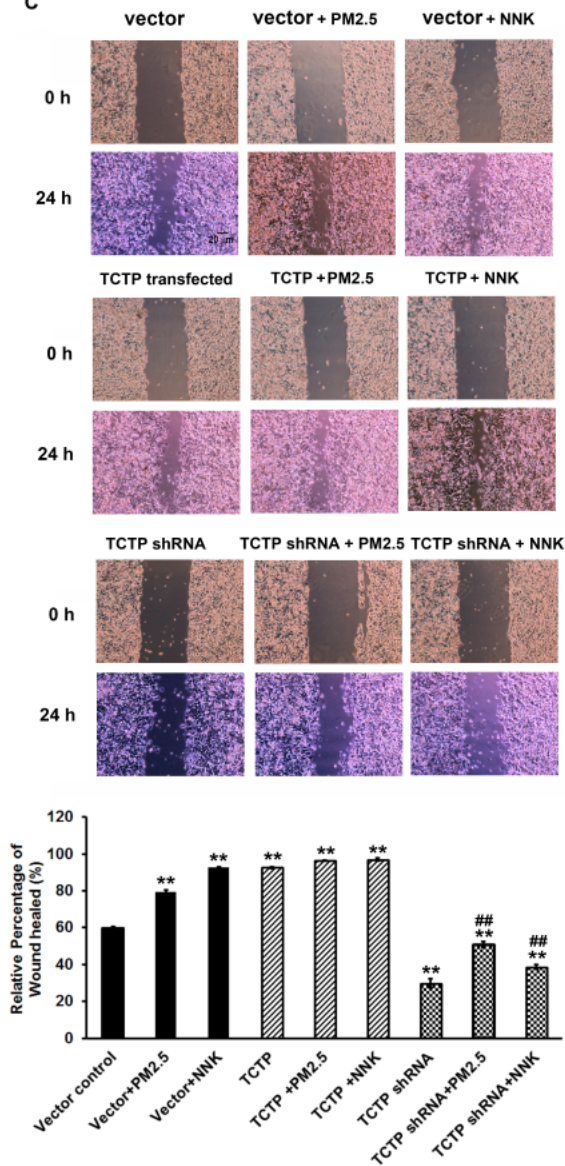

**D**

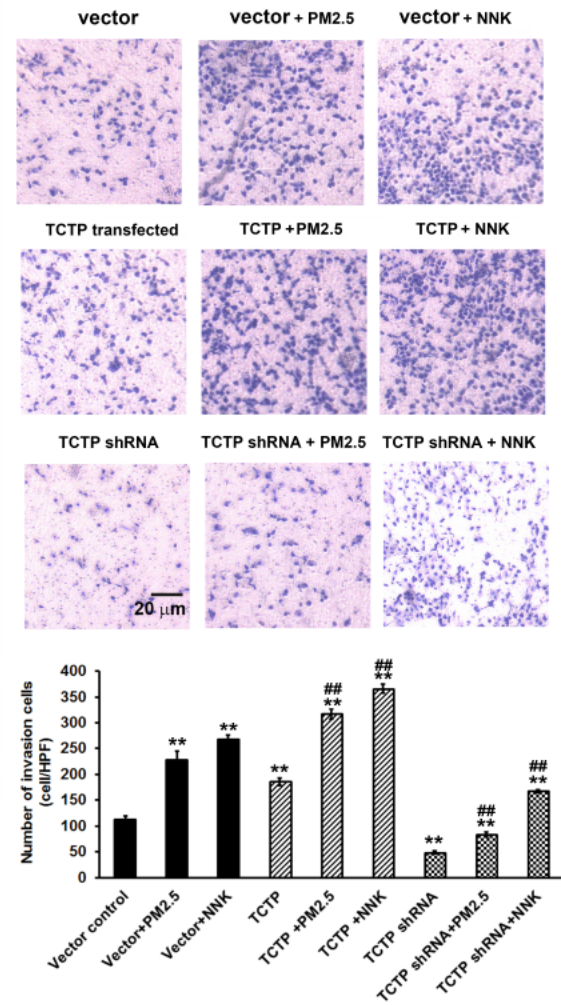

**Figure S1. TCTP controlled Vimentin expression and mediated PM<sub>2.5</sub>- and NNK-induced metastasis of lung cells. (A) TCTP and Vimentin expression in cells transfected with different vectors. Bet1A or NCI-H23 cells were transfected with scramble shRNA pSicoR vector (Scr), empty pEGFP vector, or scramble shRNA pSicoR vector + empty pEGFP vector (Scr+pEGFP) respectively for 24 h. Non-transfected cells were set up as control. The levels of TCTP and vimentin were determined as indicated. The equal loading was confirmed by measuring actin protein. (B) TCTP controlled vimentin expression. NCI-H23 cells were first treated with PM<sub>2.5</sub> or NNK for 28 days, then the cells were co-transfected with scramble shRNA pSicoR vector + empty pEGFP vector or cells were transfected with pSicoR vector containing TCTP shRNA or pEGFP vector containing TCTP gene respectively. The levels of TCTP and vimentin were determined as indicated. The equal loading was confirmed by measuring actin protein. The quantification of protein was carried out by densitometry analysis, and the result was presented by the relative intensity of the control condition based on actin normalization for total protein. The relative intensity of protein bands was summarized by column figure. The values indicate the mean  $\pm$  SD of three independent experiments (\*\* $p < 0.01$  vs vector control; ### $p < 0.01$  vs vector+PM<sub>2.5</sub> or vector+NNK respectively). (C) TCTP was required for PM<sub>2.5</sub>- or NNK-induced cell migration. NCI-H23 cells were treated with PM<sub>2.5</sub> or NNK for 28 days. Then the cells were transfected with empty vector or vector contained TCTP gene or TCTP shRNA respectively. Cell migration was detected by wound-healing assay. Images were taken using phase contrast microscope (Nikon) (scale bar, 20  $\mu$ m). The relative percentage of wound healed was expressed as the values indicated the mean  $\pm$  SD of three independent experiments. \*\* $p < 0.01$  vs vector control; ### $p < 0.01$  vs vector+PM<sub>2.5</sub> or vector+NNK respectively. (D) TCTP was required for PM<sub>2.5</sub>- or NNK-**

**induced cell invasion.** NCI-H23 cells were treated by PM<sub>2.5</sub> or NNK for 28 days. Then the cells transfected with vectors as indicated. Cell invasion was detected by trans-well experiment. Images were taken using phase contrast microscope (Nikon) (scale bar, 20 μm). The numbers of invading cells in four randomly selected high-power fields (HPF) were counted and the average number of cells in a HPF was calculated. The values indicate the mean ± SD of three independent experiments. \*\* $p < 0.01$  vs vector control; ## $p < 0.01$  vs vector+PM<sub>2.5</sub> or vector+NNK respectively.

Figure S2A

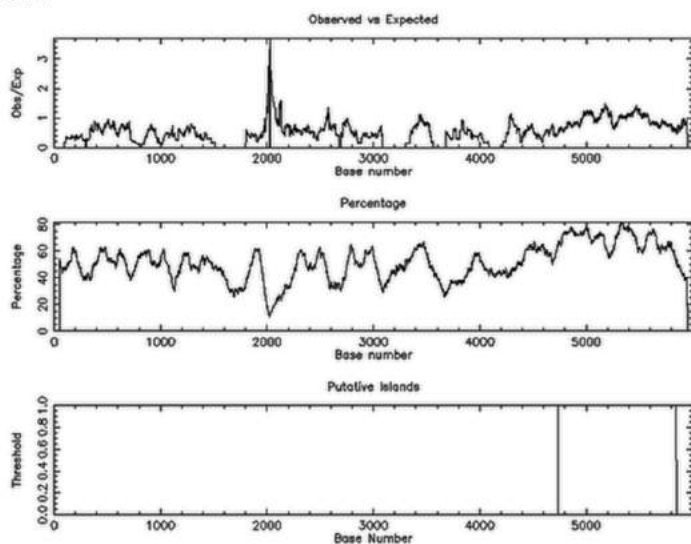

CPGPlot islands of unusual CG composition  
EMBOSS\_001 from 1 to 6000

Observed/Expected ratio > 0.60  
Percent C + Percent G > 50.00  
Length > 200

Length 1110 (4738..5847)

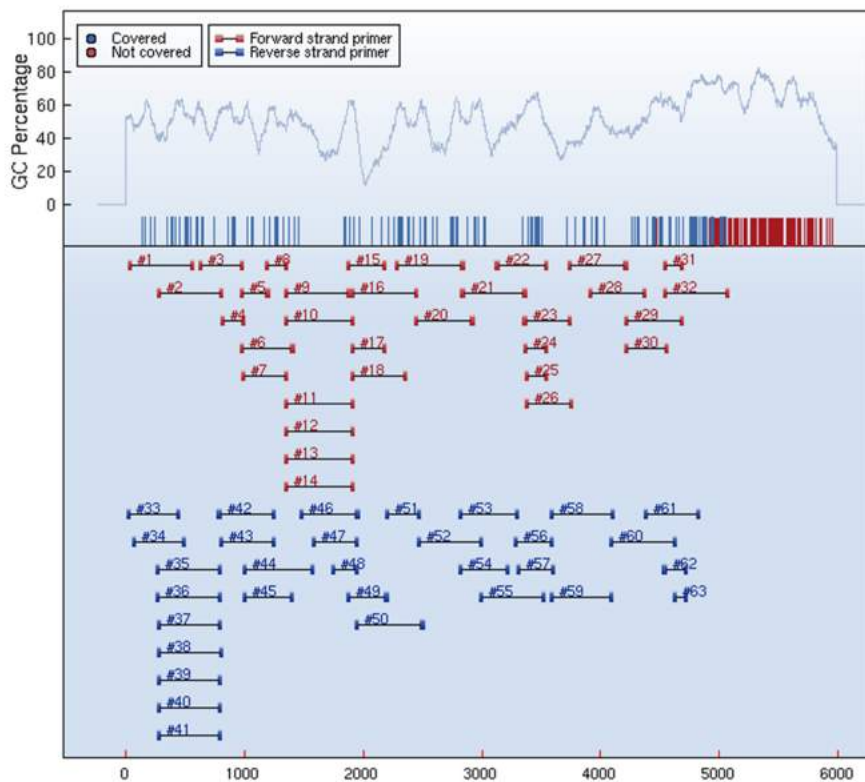

Figure S2B

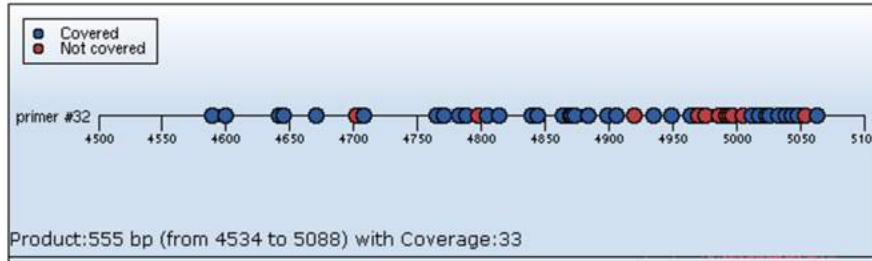

aaaaactcagctggggcagccctggggcagatctgaaaagtgtcagagccctCGggcagtcCGagatctaccagccagagggcctgaccctcct  
 aatgCGaCGttctctaccttgggtgatactcaCGttcccagaaaagggtggaacctaggctggaCGaggCGcaggccaagtttaattccttaagctc  
 caccagctccagcaccctctcaggCGgcccCGtgggttagggCGgagcCGgtccaaCGtactcCGcttccccCGctccaccaccagggctagg  
 agCGcccCGagagttggcctctcccaCGctgCGCGCGcacctcccCGccccaccctaccCGctggCGtcccagtgaaCGgagccttgtctc  
 CGcctcaagtcCGgatgctcaactcccCGactCGccccCGctgtgcccCGccccCGCGCGgctCttCGtccaCGtcacCGcctgCGtCGcttc  
 CGgaggCGcagCGggCGatgaCGtagaggaCGtccctctatatgagttgggag

| Primer                                            | Start | Size | Tm    | GC% | C's |
|---------------------------------------------------|-------|------|-------|-----|-----|
| 5' end                                            | 4534  | 25   | 59.94 | 32  | 8   |
| 3' end                                            | 5088  | 25   | 61.10 | 40  | 4   |
| PRODUCT Size:555, No of CpG's : 44, Coverage : 33 |       |      |       |     |     |

5' : aggaagagagAAAATTTAGTTGGGGTAGTTTTGG  
 3' : cagtaatacgactcactataggagaaggctCTCCCCAACCTCATATAAAAAACAC

Figure S2C

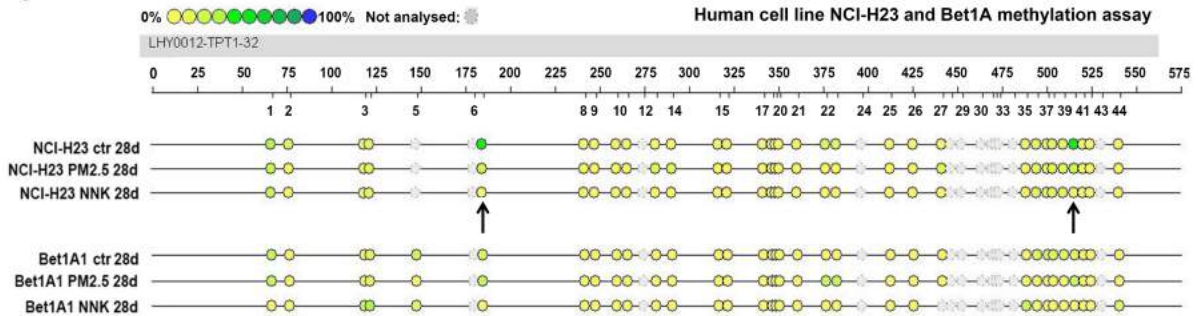

**Figure S2. MassArray for TCTP methylation detection. (A) Prediction of potential CpG islands by linking to [http://www.ebi.ac.uk/Tools/seqstats/emboss\\_cpgplot/](http://www.ebi.ac.uk/Tools/seqstats/emboss_cpgplot/). The CpG islands from 5000bp upstream of start codon to 1000bp downstream of start codon of TCTP genes were predicted by the software [www.ebi.ac.uk/Tools/seqstats/emboss\\_cpgplot/](http://www.ebi.ac.uk/Tools/seqstats/emboss_cpgplot/). One potential CpG island was found which located from 4738-5847 bp (Length 1110 bp) of the 6000 bp sequence analyzed. (B) Primers design using sequenom®EpiDesigner program. Plan #32 was recommended and selected for the methylation assay. One CpG island found in TCTP promotor**

region was analyzed by Plan #32 (coverage of 555bp from 4534 to 5088) of the promotor. **(C) Change of TCTP promotor methylation after PM<sub>2.5</sub> or NNK treatment.** NCI-H23 and Bet1A cells were treated with PM<sub>2.5</sub> and NNK respectively for 28 d. Then the methylation of CpG islands was examined. For cancer cell line NCI-H23, among the 44 CpG points detected, only two points of CpG islands (CpG 7 and CpG 40) exhibited a 42% methylation in basal state. The methylation reduced 50% after PM<sub>2.5</sub> treatment for 28d while the methylation disappeared after NNK treatment (also refer to Table S2). The two sites with the greatest change in methylation level were labeled with arrows. For normal lung epithelial cell Bet1A, there was only 17% methylation on the same CpG islands (CpG 7 and CpG 40) in basal state. The methylation reached 30% after cells were treated with PM<sub>2.5</sub> whereas NNK exposure eliminated the methylation (also refer to Table S2).

Figure S3

A

XbaI in PGL3-promotor-vector and Six selected restriction enzymes

| name  | sequence                             |
|-------|--------------------------------------|
| XbaI  | 5'...TCTAGA...3'<br>3'...AGATCT...5' |
| AgeI  | 5'...ACCGGT...3'<br>3'...TGGCCA...5' |
| ApaI  | 5'...GGGCC...3'<br>3'...CCCGG...5'   |
| EcoRI | 5'...GAATTC...3'<br>3'...CTTAAG...5' |
| NdeI  | 5'...CATATG...3'<br>3'...GTATAC...5' |
| PstI  | 5'...CTGCAG...3'<br>3'...GACGTC...5' |
| SpeI  | 5'...ACTAGT...3'<br>3'...TGATCA...5' |

Sequences for cloning MCS into the vector:

Forward (5'-3'): CTAGAACACTAGTTGCTGCAGACCATATGTCGAATTCAGGGGCCCTGACCGGTA

Reverse (5'-3'): CTAGAGTACCGGTCAGGGCCCTGAATTCGACATATGGTCTGCAGCACTAGTGT

Orientation of MCS in the vector confirmed by sequencing: *SpeI-PstI-NdeI-EcoRI-ApaI-AgeI*

B

TCTP 3'-UTR

```

1 CAAAUGGGCAAUUUUUUGGAUCUAUCACCUGUCAUCAUAACUGGCUUCUGUGUCAUCCACACAACCCAGG 75
76 ACUUAAGACAAAUGGGACUGAUGUCAUCUUGAGCUCUUAUUUUUGACUGUGAUUUUUUGGAGUGGAGCA 150
151 UUGUUUUUAGAAAAACAUGUCAUGUAGGUUGUCUAAAAUAAAUGCAUUUAAACUCAUUUGAGAG 217
    
```

C

Corresponding sequence of cDNA to 3'-UTR of TCTP

```

601 ggaaaaatgt taacaatgt ggcaattatt ttggatctat cacctgtcat cataactggc
661 ttctgtctgt catccacaca acaccaggac ttaagacaaa tggactgat gtcactctga
721 gctcttcatt tattttgact gtgatttatt tggagtggag gcattgtttt taagaaaaac
781 atgtcatgta gtttgtctaa aaataaaatg catttaaact catttgagag
    
```

Primers: (PCR product size 235bp)

TCTP-UTR\_EcoRI-F: GGT G'AATTC CAA ATG TGG CAA TTA TTT TGG

TCTP-UTR\_AgeI-R: CCT A'CCGGT CTC TCA AAT GAG TTT AAA TGC

D

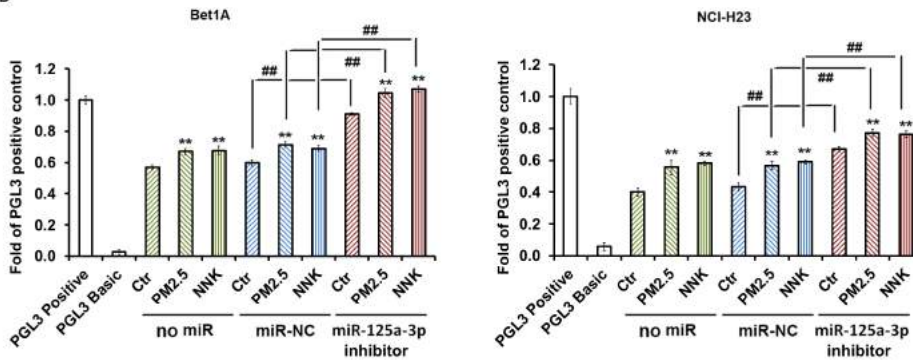

**Figure S3. (A-C) Cloning of TCTP 3'-UTR.** The Luc-TCTP-WT with full-length 3'-untranslated region (UTR) of TCTP (217 nt) were cloned into pGL3-promoter-vector. **(A) Reconstruction of pGL3-promoter-vector.** pGL3-promoter-vecotr contains XbaI site at the end of luciferase gene. Six restriction enzymes that do not cut the pGL3-promoter-vector, *AgeI*, *ApaI*,



*EcoRI*, *NdeI*, *PstI* and *SpeI*, were selected. A newly designed MCS (multiple cloning site) within XbaI site was inserted, which allows cloning of control element (e.g. 3'-UTR) into pGL3-promoter after Luc gene. The orientation of MCS was *SpeI-PstI-NdeI-EcoRI-ApaI-AgeI* as confirmed by sequencing after cloning. **(B) The sequence of TCTP 3'-URT. (C) Cloning of TCTP 3'-UTR into the pGL3-promoter-vector.** The cDNA fragment of TCTP (<https://www.ncbi.nlm.nih.gov/nuccore/555943819>) was amplified by reverse-transcription PCR using the following primer: TCTP-UTR\_EcoRI-Forward GGTG'AATTCCAAATGTGGCAATTATTTGG and TCTP-UTR\_AgeI-Reverse CCTA'CCGGTCTCTCAAATGAGTTTAAATGC. The PCR products were 235bp. **(D) TCTP transcriptional activity was upregulated by miR-125a-3p inhibitor.** Bet1A cells and NCI-H23 cells were treated with PM<sub>2.5</sub> or NNK for 28 days and were con-transfected with miR-125a-3p inhibitor and miR-NC (#339121 miRCURY LNA miRNA Inhibitor, Qiagen MD) respectively with luciferase reporter constructs containing the pGL3-TCTP 3'-UTR. The pGL3 basic vector and the pGL3 control were used as negative and positive controls respectively. Reporter assays were performed using the Dual-luciferase assay system, normalized for transfection efficiency by co-transfected Renilla luciferase. Data was expressed as mean ± SD of three independent experiments performed in triplicate. \*\**p*<0.01 vs control, and ##*p*<0.01 when compared between indicated groups.

**Table S1. Baseline demographic characteristics of 109 human NSCLC patients underwent TCTP and Vimentin analysis.**

| Characteristics                        | Tumor TCTP expression |              |        | Tumor Vimentin expression |              |         |
|----------------------------------------|-----------------------|--------------|--------|---------------------------|--------------|---------|
|                                        | High level            | Normal level | p      | High level                | Normal level | p       |
| <b>Overall</b>                         | 68                    | 41           | < 0.01 | 61                        | 48           | < 0.001 |
| <b>Age</b>                             |                       |              |        |                           |              |         |
| <b>≤65</b>                             | 31                    | 14           |        | 30                        | 14           |         |
| <b>&gt;65</b>                          | 37                    | 27           | 0.3157 | 31                        | 34           | 0.0345  |
| <b>Gender</b>                          |                       |              |        |                           |              |         |
| <b>Male</b>                            | 50                    | 25           |        | 42                        | 35           |         |
| <b>Female</b>                          | 18                    | 16           | 0.0844 | 19                        | 13           | 0.8985  |
| <b>Smoking status</b>                  |                       |              |        |                           |              |         |
| <b>smoker</b>                          | 25                    | 9            |        | 17                        | 17           |         |
| <b>ex-smoker</b>                       | 20                    | 16           |        | 18                        | 18           |         |
| <b>non-smoker</b>                      | 23                    | 16           | 0.2582 | 26                        | 13           | 0.2438  |
| <b>Histology</b>                       |                       |              |        |                           |              |         |
| <b>squamous cell carcinoma</b>         | 19                    | 8            |        | 15                        | 12           |         |
| <b>adenocarcinoma</b>                  | 40                    | 25           |        | 37                        | 28           |         |
| <b>large cell carcinoma</b>            | 5                     | 1            |        | 2                         | 4            |         |
| <b>poorly differentiated carcinoma</b> | 4                     | 7            | 0.1682 | 7                         | 4            | 0.6741  |
| <b>Tumor size</b>                      |                       |              |        |                           |              |         |
| <b>&lt;50mm</b>                        | 47                    | 20           |        | 36                        | 33           |         |
| <b>50mm≥</b>                           | 21                    | 21           | 0.0431 | 25                        | 15           | 0.3230  |
| <b>Pathology stage</b>                 |                       |              |        |                           |              |         |
| <b>I-II</b>                            | 52                    | 30           |        | 49                        | 36           |         |
| <b>III-IV</b>                          | 16                    | 11           | 0.8193 | 16                        | 11           | 0.4934  |

**Table S2. Human TCTP gene methylation level in NCI-H23 and Bet1A cells treated by PM2.5 and NNK.**

| SampleID                                 | CPG Position    | NCI-H23   |            |             | Bet1A1    |            |             |
|------------------------------------------|-----------------|-----------|------------|-------------|-----------|------------|-------------|
|                                          |                 | ctr 28day | NNK 28 day | PM2.5 28day | ctr 28day | NNK 28 day | PM2.5 28day |
| LHY0012-TPT1-32_CpG_1                    | 66              | 0.33      | 0.24       | 0.23        | 0.26      | 0.09       | 0.29        |
| LHY0012-TPT1-32_CpG_2                    | 76              | 0.16      | 0          | 0           | 0         | 0          | 0           |
| LHY0012-TPT1-32_CpG_3                    | 118             | 0         | 0          | 0           | 0         | 0.28       | 0.03        |
| LHY0012-TPT1-32_CpG_4                    | 121             | 0.16      | 0.22       | 0.15        | 0.15      | 0.33       | 0.19        |
| LHY0012-TPT1-32_CpG_5                    | 147             | NA        | NA         | NA          | 0.29      | 0.19       | 0.1         |
| LHY0012-TPT1-32_CpG_6                    | 179             | NA        | NA         | NA          | NA        | NA         | NA          |
| LHY0012-TPT1-32_CpG_7                    | 184             | 0.42      | 0          | 0.21        | 0.17      | 0          | 0.3         |
| LHY0012-TPT1-32_CpG_8.9                  | 241:247         | 0         | 0.09       | 0.02        | 0.04      | 0.03       | 0           |
| LHY0012-TPT1-32_CpG_10                   | 259             | 0         | 0          | 0           | 0         | 0          | 0           |
| LHY0012-TPT1-32_CpG_11                   | 265             | 0         | 0.05       | 0           | 0         | 0          | 0           |
| LHY0012-TPT1-32_CpG_12                   | 274             | NA        | NA         | NA          | NA        | NA         | NA          |
| LHY0012-TPT1-32_CpG_13.14                | 281:290         | 0.05      | 0.06       | 0.19        | 0.02      | 0          | 0.02        |
| LHY0012-TPT1-32_CpG_15.16                | 316:321         | 0         | 0          | 0           | 0         | 0          | 0           |
| LHY0012-TPT1-32_CpG_17.18.19.20          | 341:346:348:350 | 0.06      | 0.04       | 0.05        | 0.07      | 0.02       | 0.02        |
| LHY0012-TPT1-32_CpG_21                   | 360             | 0         | 0.08       | 0           | 0         | 0.05       | 0           |
| LHY0012-TPT1-32_CpG_22.23                | 376:382         | 0.16      | 0.1        | 0.03        | 0.08      | 0.06       | 0.23        |
| LHY0012-TPT1-32_CpG_24                   | 396             | NA        | NA         | NA          | NA        | NA         | NA          |
| LHY0012-TPT1-32_CpG_25                   | 412             | 0.09      | 0          | 0           | 0.03      | 0          | 0           |
| LHY0012-TPT1-32_CpG_26                   | 425             | 0         | 0          | 0           | 0         | 0          | 0           |
| LHY0012-TPT1-32_CpG_27                   | 441             | 0         | 0          | 0.19        | 0.01      | NA         | 0.09        |
| LHY0012-TPT1-32_CpG_28.29.30.31.32.33.34 | 469:471:473:481 | NA        | NA         | NA          | NA        | NA         | NA          |
| LHY0012-TPT1-32_CpG_35                   | 488             | 0.05      | 0          | 0           | 0         | 0.28       | 0           |
| LHY0012-TPT1-32_CpG_36.37.38.39          | 494:500:503:509 | 0.12      | 0.11       | 0.13        | 0.11      | 0.07       | 0.01        |
| LHY0012-TPT1-32_CpG_40                   | 515             | 0.42      | 0          | 0.21        | 0.17      | 0          | 0.3         |
| LHY0012-TPT1-32_CpG_41.42                | 520:524         | 0.02      | 0.02       | 0.03        | 0         | 0          | 0.01        |
| LHY0012-TPT1-32_CpG_43                   | 530             | NA        | NA         | NA          | NA        | NA         | NA          |
| LHY0012-TPT1-32_CpG_44                   | 540             | 0         | 0          | 0           | 0         | 0.14       | 0           |

Note: Same color of CpG site means that the length of PCR products are identical and the methylation unit presented are the mean of the two sites' methylation level.
